# Supplementary material for: Prediction Models for Radiation-Induced Neurocognitive Decline in Adult Patients With Primary or Secondary Brain Tumors: A Systematic Review
Source: Front Psychol. 2022 Mar 31;13:853472. doi: 10.3389/fpsyg.2022.853472 (PMC9009149; doi:10.3389/fpsyg.2022.853472)
Supplement: Supplementary file 2 [file Table_1.XLSX]

## Sheet: Data Extraction
ID	DOI	Year	First Author	Country	Data Source	Sample Size	Age (mean)	Male Gender	Elderly	Brain Tumor Type	Primary Tumor (if Metastasis)	Prophylactic	Type of Brain Irradiation	Surgery	Chemotherapy	Modeling Technique	Measuring	Acute/Late	Model Evaluation	Coefficient	Intercept	Prediction Equation
1	10.1016/s0167-8140(96)91782-x	1996	Gregor	UK	Retrospective cohort	30	NA	14	No	Gliomas	NA	No	RT	Yes	No	Logistic Regression	NART, WAIS	Late	No	Odds Ratio	NA	Type of radiotherapy (WBRT vs. Focused RT)*7.1
2	10.1200/JCO.1998.16.3.864	1998	Blay	France	Retrospective cohort	226	61	143	No	Cerebral lymphomas	NA	No	RT	Yes	Yes	Cox Regression	Neuroimagings	Late	No	Relative Risk	NA	Post-operative treatment (RT followed by CT)*11.5
3	10.1016/s0140-6736(02)11398-5	2002	Klein	Netherlands	Prospective cohort	295	NA	171	No	Gliomas	NA	No	RT	Yes	No	Linear Regression	SCWT	Late	No	Relative Risk	NA	Antiepileptic*5.79+Tumor lateralization*5.3
4	10.1023/b:neon.0000021900.29176.58	2004	Kaleita	USA	Prospective cohort	79	41.1	43	No	Brain tumor	NA	No	RT	Yes	Yes	Linear Regression	TMT A	Late	No	Linear Beta	3.932	Frontal*1.005+GBM*−0.812+Age (36–59 vs. ≤35)*−1.174
5	10.1016/j.ijrobp.2007.01.017	2007	Van Beek	Netherlands	Retrospective cohort	81	55	49	No	Pitutary Adenoma	NA	No	Conventional	Yes	No	Linear Regression	RAND-36	Late	No	Linear Beta	NA	Radiotherapy*0.56+Male*0.48+Intact HPA axis*0.57
6	10.1016/j.ijrobp.2009.06.004	2010	Wang	USA	Randomized Controlled Trial	299	NA	NA	No	Oligodendrogliomas	NA	No	RT	Yes	Yes	Linear Regression	MMSE	Late	No	Linear Beta	NA	Assessment time (time)*–0.0132+KPS (80–100)*2.7240+Age (<50)*1.4106
7	10.3171/2010.11.JNS101193	2011	Starke	USA	Prospective cohort	152	58	30	No	Meningioma	NA	No	Gamma Knife Radiosurgery	Yes	No	Logistic Regression	Neuroimagings	Late	No	Odds Ratio	NA	clival/petrous vs petroclival*4
10	10.1016/j.ijrobp.2011.10.021	2012	Gondi	USA	Prospective cohort	29	NA	13	No	Brain tumor	NA	No	Stereotactic Radiotherapy	Yes	No	Logistic Regression	WMS III WL	Late	No	Odds Ratio	NA	D40% of hippocampus >7.3 Gy*19.3
11	10.1093/neuonc/nos244	2012	Kangas	Australia	Retrospective cohort	65	50.6	32	No	Brain tumor	NA	No	Fractionated+Steriotactic	Yes	Yes	Linear Regression	FACT-G	Acute	No	Linear Beta	NA	Malignant (vs. benign)*-0.23+Baseline PCL-S*-0.31+baseline FACT-G/Br*0.76+baseline POMS depression*-0.46
15	10.1016/j.radonc.2016.06.021	2016	Chapman	USA	Prospective cohort	27	48	15	No	Brain tumor	NA	No	IMRT+3D-CRT	Yes	Yes	Linear Regression	HVLT-PR	Late	No	Linear Beta	NA	Baseline HVLT-R score*-0.62+Frontotemporal*-2.19+Age*-0.06
20	10.1002/pon.5202	2019	Wong	USA	Randomized Controlled Trial	198	52.8	92	No	Brain tumor	NA	No	RT	Yes	No	Logistic Regression	DS (Digit Span)+HVLT-R+COWA+TMT	Late	No	Odds Ratio	NA	Fatigue*1.05
21	10.1093/neuros/nyaa107	2020	Gui	USA	Prospective cohort	30	58	44	No	Glioblastoma	NA	No	IMRT	Yes	Yes	Linear Regression	HVLT-R Delayed Recall	Late	No	Linear Beta	NA	Mean dose to ipsilateral hippocampus*−0.064+Mean dose to bilateral hippocampi*−0.084+Mean dose to ipsilateral SVZ*−0.089+Mean dose to bilateral SVZ*−0.13
23	10.1016/j.radonc.2019.12.024	2020	Dutz	Germany	Retrospective cohort	62	47	39	No	Brain tumor	NA	No	Proton Therapy	Yes	Yes	Linear Mixed Model	MoCA	Late	No	Linear Beta	-1.16	Left location(vs. central)*2.37+Cerebellum anterior V30Gy(RBE)*-5.14+Cerebellum anterior V40Gy(RBE)*-6.85
24	10.1016/j.ijrobp.2020.07.002	2020	Tibbs	USA	Randomized Controlled Trial	54	47	32	No	Brain tumor	NA	No	IMRT/VMAT+Proton	Yes	Yes	Linear Mixed Model	DKEFS-TMT	Late	No	Linear Beta	NA	Beck Anxiety Inventories*-0.425
25	10.1007/s11060-020-03650-1	2021	Zamanipoor	Netherlands	Retrospective cohort	190	63	41	No	Meningioma	NA	No	RT	Yes	No	Logistic Regression	Digit-Symbol Substitution Test, Auditory Verbal Learning Test, Categoric Word Fluency Test, Concept Shifting Test, Memory Comparison Test,Stroop Colour-Word Test	Late	AUC: 0.78	Odds Ratio	NA	Age*1.024+Tumor size before last intervention (mm)*1.022+Second resection yes (ref: no)*2.662+Radiotherapy yes (ref: no)*2.819+Educational level*0.359+Years since diagnosis*1.130
26	10.1016/j.tipsro.2021.01.004	2021	Langegard	Sweden	Retrospective cohort	266	NA	126	No	Brain tumor	NA	No	Proton Therapy	Yes	Yes	Linear Regression	QlQ-BN20	Acute	No	Linear Beta	NA	Marital status(living alone vs. married)*3.97+More comorbidity (SCQ > 4 points)*6.71
8	10.1016/j.ijrobp.2010.05.013	2011	Wolfson	USA	Randomized Controlled Trial	75	NA	NA	No	Brain metastasis	SCLC	Yes	RT	No	Yes	Logistic Regression	HVLT, COWAT, TMT-A or -B	Late	No	Odds Ratio	NA	Treatment Type (2.0 Gy_18 vs. 2.5 Gy_10)*8+Treatment Type (1.5 Gy_24 vs. 2.5 Gy_10)*4.37+Age*1.12+Education Level (<=High school vs. >High school)*2.96
13	10.1007/s11060-013-1071-0	2013	Nakazaki	Japan	Retrospective cohort	76	65.5	51	No	Brain metastasis	Case-mix (lung, colorectal, breast, other)	No	Gamma Knife Radiosurgery	Yes	No	Cox Regression	MMSE	Late	No	Hazard Ratio	NA	larger volume of the largest metastasis*1.102
12	10.1016/j.ijrobp.2013.02.033	2013	Gondi	USA	Randomized Controlled Trial	583	NA	350	No	Brain metastasis	SCLC	Yes	RT	No	Yes	Logistic Regression	HVLT-R Delayed Recall	Late	No	Odds Ratio	NA	No Prophylactic cranial irradiation*2.49+Baseline impairment in HVLT-R*3.33+Age<=60*2.52
16	10.1016/j.ijrobp.2017.04.037	2017	Yamamoto	Japan	Prospective cohort	1194	NA	NA	No	Brain metastasis	Case-mix (lung, breast, GI, kidney, other)	No	Stereotactic Radiosurgery	No	No	Cox Regression	CTCAE v.3	Late	No	Hazard Ratio	NA	age<65*1.455+large tumor with maximum diameter of largest tumor>=1.6 cm*0.375+neurologic symptoms*0.413
17	10.1016/j.ijrobp.2017.02.031	2017	Chen	USA	Retrospective cohort	119	NA	NA	Yes	Brain metastasis	Case-mix (lung, melanoma, kidney, other)	No	Stereotactic Radiosurgery+WBRT	Yes	No	Logistic Regression	RTOG	Acute	No	Odds Ratio	NA	WBRT (vs. Steriotactic radiosurgery)*2.82
18	10.1007/s11060-019-03235-7	2019	Gui	USA	Randomized Controlled Trial	22	61.8	10	No	Brain metastasis	SCLC	Yes	RT	No	Yes	Linear Regression	HVLT-R Delayed Recall	Late	No	Linear Beta	NA	Absolute change in whole brain volume (mL)*0.060+Proportional change in whole brain volume (%)*0.79
22	10.1200/JCO.19.02767	2020	Brown	USA	Randomized Controlled Trial	518	NA	219	No	Brain metastasis	Case-mix (lung, breast, skin, Bone, colon, esophagus, kidney, ovary, anal, pancreas, other)	No	IMRT	Yes	Yes	Cox Regression	HVLT-R	Late	No	Hazard Ratio	NA	Age<=61*0.635+HA-WBRT plus memantine(vs WBRT plus memantine)*0.745
